# Supplementary material for: Chiral selection in the formation of borates from racemic binaphthols and related diols
Source: Royal Society of Chemistry journal article supplement (doi:10.1039/c0ce00709a), 2011-01-01
Supplement: c0ce00709a.pdf [file c0ce00709a.pdf]

# **Chiral Selection in the Formation of Borates From Racemic Binaphthols and Related Diols.**

**Jevgenij A. Raskatov, John M. Brown and Amber L. Thompson.\***

## **Supplementary Information**

- |                                                                      |             |
|----------------------------------------------------------------------|-------------|
| <b>1. Computational studies on BINOL-related anions; summary</b>     | <b>2</b>    |
| <b>2. XYZ parameters and energies resulting from the computation</b> | <b>3-14</b> |

## DFT-SI

Computational work was carried out using Gaussian09, on both diastereomers of anions **2**, **5** **6** and **7** respectively. For the fast interconverting atropisomers of anion **7**, the transition state was located. All the conclusions were unaltered by inclusion of diffusion functions in the B3LYP functional.

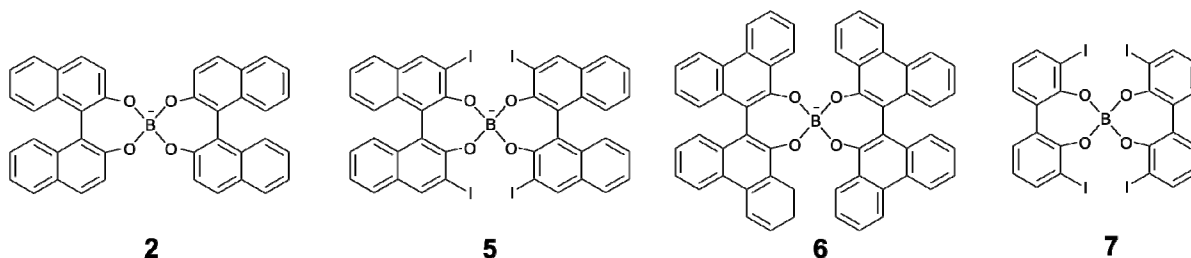

### 6-31G\*

|                      | HF        | ZPE      | SUM       | kcal/mol  | rel         | IMAG  |
|----------------------|-----------|----------|-----------|-----------|-------------|-------|
| (R,R)ax-7            | -1293.407 | 0.299631 | -1293.107 | -811437.7 | <b>0.0</b>  |       |
| (R,R)ax-TS-(R,S)ax-7 | -1293.395 | 0.299415 | -1293.095 | -811430.2 | <b>7.5</b>  | -70.1 |
| (R,S)ax-7            | -1293.401 | 0.299606 | -1293.102 | -811434.2 | <b>3.5</b>  |       |
|                      |           |          |           |           |             |       |
| (R,R)ax-2            | -1864.751 | 0.529342 | -1864.222 | -1169818  | <b>-0.1</b> |       |
| (R,S)ax-2            | -1864.751 | 0.529388 | -1864.221 | -1169818  | <b>0.0</b>  |       |
|                      |           |          |           |           |             |       |
| (R,R)ax-5            | -1907.945 | 0.486345 | -1907.459 | -1196950  | <b>4.3</b>  |       |
| (R,S)ax-5            | -1907.952 | 0.486601 | -1907.466 | -1196954  | <b>0.0</b>  |       |
|                      |           |          |           |           |             |       |
| (R,R)ax-6            | -2479.335 | 0.71747  | -2478.618 | -1555357  | <b>3.1</b>  |       |
| (R,S)ax-6            | -2479.34  | 0.717503 | -2478.623 | -1555360  | <b>0.0</b>  |       |

### 6-31+G\*; ZPE from 6-31G\*

|                      |           |          |           |           |            |
|----------------------|-----------|----------|-----------|-----------|------------|
| (R,R)ax-7            | -1293.458 | 0.299631 | -1293.159 | -811469.9 | <b>0.0</b> |
| (R,R)ax-TS-(R,S)ax-7 | -1293.445 | 0.299415 | -1293.146 | -811462   | <b>7.9</b> |
| (R,S)ax-7            | -1293.451 | 0.299606 | -1293.152 | -811465.7 | <b>4.2</b> |
|                      |           |          |           |           |            |
| (R,R)ax-2            | -1864.82  | 0.529342 | -1864.291 | -1169861  | <b>0.4</b> |
| (R,S)ax-2            | -1864.821 | 0.529388 | -1864.292 | -1169862  | <b>0.0</b> |
|                      |           |          |           |           |            |
| (R,R)ax-5            | -1908.015 | 0.486345 | -1907.528 | -1196993  | <b>4.9</b> |
| (R,S)ax-5            | -1908.023 | 0.486601 | -1907.536 | -1196998  | <b>0.0</b> |
|                      |           |          |           |           |            |
| (R,R)ax-6            | -2479.419 | 0.71747  | -2478.701 | -1555410  | <b>3.2</b> |
| (R,S)ax-6            | -2479.424 | 0.717503 | -2478.706 | -1555413  | <b>0.0</b> |

### 6-31+G\*

|                      |           |          |           |           | IMAG       |
|----------------------|-----------|----------|-----------|-----------|------------|
| (R,R)ax-7            | -1293.458 | 0.299017 | -1293.159 | -811470.3 | <b>0.0</b> |
| (R,R)ax-TS-(R,S)ax-7 | -1293.445 | 0.298966 | -1293.146 | -811462.3 | <b>8.0</b> |
| (R,S)ax-7            | -1293.451 | 0.298904 | -1293.152 | -811466.1 | <b>4.2</b> |

| $(R,R)_{ax-2}$         |           |           |           |                        |           |           |           |
|------------------------|-----------|-----------|-----------|------------------------|-----------|-----------|-----------|
| B3LYP/BS1              |           |           |           | B3LYP/BS2              |           |           |           |
| 69                     |           |           |           | 69                     |           |           |           |
| scf done: -1864.750857 |           |           |           | scf done: -1864.820165 |           |           |           |
| B                      | 0.000004  | -0.000002 | -0.000400 | B                      | 0.000011  | -0.000002 | -0.000357 |
| C                      | -6.202913 | 3.011937  | -1.808598 | C                      | -6.207282 | 3.010054  | -1.814276 |
| C                      | -6.197032 | 1.600213  | -1.897232 | C                      | -6.194892 | 1.597259  | -1.910896 |
| C                      | 1.910018  | 1.445318  | -0.433986 | C                      | 1.915376  | 1.446197  | -0.440196 |
| C                      | -5.161758 | 3.651881  | -1.174727 | C                      | -5.171112 | 3.651672  | -1.168835 |
| C                      | 3.021872  | 0.743551  | 0.043575  | C                      | 3.025075  | 0.743496  | 0.040693  |
| C                      | -5.178455 | 0.863721  | -1.332460 | C                      | -5.175175 | 0.861438  | -1.342281 |
| C                      | 4.097704  | 1.487096  | 0.642551  | C                      | 4.100640  | 1.486715  | 0.643002  |
| C                      | 1.919959  | 2.867361  | -0.482836 | C                      | 1.931498  | 2.868269  | -0.502927 |
| C                      | -1.910011 | -1.445330 | -0.433958 | C                      | -1.915356 | -1.446213 | -0.440158 |
| C                      | 4.087911  | 2.923725  | 0.597875  | C                      | 4.096974  | 2.923356  | 0.589399  |
| C                      | 3.021951  | -0.743467 | -0.043776 | C                      | 3.025145  | -0.743424 | -0.040869 |
| C                      | -3.021865 | -0.743551 | 0.043586  | C                      | -3.025056 | -0.743496 | 0.040706  |
| C                      | 5.178017  | 0.864061  | 1.332843  | C                      | 5.174766  | 0.861752  | 1.342669  |
| C                      | 4.098025  | -1.486900 | -0.642454 | C                      | 4.100927  | -1.486544 | -0.642913 |
| C                      | -1.919955 | -2.867374 | -0.482781 | C                      | -1.931483 | -2.868286 | -0.502852 |
| C                      | -4.097705 | -1.487081 | 0.642563  | C                      | -4.100639 | -1.486695 | 0.643005  |
| C                      | 6.196355  | 1.600677  | 1.897884  | C                      | 6.194258  | 1.597690  | 1.911536  |
| C                      | 5.161046  | 3.652219  | 1.175068  | C                      | 5.170475  | 3.651983  | 1.169144  |
| C                      | 1.910039  | -1.445351 | 0.433493  | C                      | 1.915390  | -1.446229 | 0.439756  |
| C                      | -4.087915 | -2.923711 | 0.597916  | C                      | -4.096978 | -2.923337 | 0.589439  |
| C                      | -3.021942 | 0.743465  | -0.043792 | C                      | -3.025124 | 0.743422  | -0.040887 |
| C                      | 6.202100  | 3.012400  | 1.809230  | C                      | 6.206537  | 3.010484  | 1.814875  |
| C                      | 2.984837  | 3.585249  | -0.004001 | C                      | 2.999121  | 3.585764  | -0.024740 |
| C                      | 4.088389  | -2.923529 | -0.597767 | C                      | 4.097394  | -2.923185 | -0.589305 |
| C                      | 1.920149  | -2.867398 | 0.482376  | C                      | 1.931654  | -2.868304 | 0.502505  |
| C                      | -2.984838 | -3.585250 | -0.003938 | C                      | -2.999115 | -3.585765 | -0.024661 |
| C                      | -5.178026 | -0.864029 | 1.332826  | C                      | -5.174786 | -0.861708 | 1.342615  |
| C                      | -1.910029 | 1.445358  | 0.433463  | C                      | -1.915367 | 1.446239  | 0.439715  |
| C                      | -2.985225 | 3.585169  | 0.003764  | C                      | -2.999445 | 3.585695  | 0.024496  |
| C                      | 5.178451  | -0.863749 | -1.332465 | C                      | 5.175161  | -0.861478 | -1.342322 |
| C                      | -6.196373 | -1.600630 | 1.897871  | C                      | -6.194298 | -1.597625 | 1.911475  |
| C                      | -5.161059 | -3.652190 | 1.175112  | C                      | -5.170497 | -3.651944 | 1.169177  |
| C                      | -1.920139 | 2.867405  | 0.482318  | C                      | -1.931632 | 2.868315  | 0.502428  |
| C                      | -4.098021 | 1.486886  | -0.642475 | C                      | -4.100920 | 1.486525  | -0.642924 |
| C                      | 2.985235  | -3.585171 | 0.003833  | C                      | 2.999462  | -3.585696 | 0.024581  |
| C                      | 6.202908  | -3.011974 | -1.808564 | C                      | 6.207259  | -3.010107 | -1.814277 |
| C                      | -4.088384 | 2.923516  | -0.597817 | C                      | -4.097388 | 2.923167  | -0.589353 |
| C                      | -6.202119 | -3.012355 | 1.809250  | C                      | -6.206575 | -3.010422 | 1.814860  |
| C                      | 5.161759  | -3.651905 | -1.174670 | C                      | 5.171105  | -3.651707 | -1.168791 |
| C                      | 6.197025  | -1.600252 | -1.897230 | C                      | 6.194864  | -1.597316 | -1.910942 |
| H                      | -2.984966 | -4.672886 | -0.049936 | H                      | -3.003616 | -4.673241 | -0.080829 |
| H                      | -1.048157 | -3.352431 | -0.911715 | H                      | -1.065298 | -3.356625 | -0.940349 |
| H                      | 2.984962  | 4.672884  | -0.050019 | H                      | 3.003618  | 4.673239  | -0.080934 |
| H                      | 1.048161  | 3.352408  | -0.911783 | H                      | 1.065316  | 3.356593  | -0.940445 |
| H                      | 5.134733  | 4.739246  | 1.117098  | H                      | 5.150024  | 4.739108  | 1.105491  |
| H                      | -5.183901 | 0.215956  | 1.424189  | H                      | -5.178446 | 0.218440  | 1.439135  |
| H                      | 6.999806  | 1.089860  | 2.424034  | H                      | 6.992649  | 1.085753  | 2.444768  |
| H                      | 7.013714  | 3.584672  | 2.252650  | H                      | 7.017879  | 3.582274  | 2.260051  |
| H                      | 5.183892  | -0.215921 | 1.424231  | H                      | 5.178424  | -0.218391 | 1.439226  |
| H                      | -7.014713 | 3.584111  | -2.251803 | H                      | -7.018799 | 3.581752  | -2.259252 |
| H                      | 5.184228  | 0.216233  | -1.423861 | H                      | 5.178737  | 0.218666  | -1.438880 |
| H                      | -6.999829 | -1.089800 | 2.424000  | H                      | -6.992704 | -1.085670 | 2.444666  |
| H                      | -7.013739 | -3.584616 | 2.252672  | H                      | -7.017932 | -3.582197 | 2.260029  |
| H                      | -5.134748 | -4.739219 | 1.117166  | H                      | -5.150049 | -4.739071 | 1.105554  |
| H                      | -7.000569 | 1.089297  | -2.423153 | H                      | -6.993377 | 1.085227  | -2.443896 |
| H                      | -5.135553 | 4.738913  | -1.116775 | H                      | -5.150754 | 4.738801  | -1.105214 |
| H                      | 7.000556  | -1.089347 | -2.423170 | H                      | 6.993332  | -1.085300 | -2.443981 |
| H                      | 7.014705  | -3.584157 | -2.251765 | H                      | 7.018765  | -3.581819 | -2.259257 |
| H                      | 5.135555  | -4.738936 | -1.116696 | H                      | 5.150747  | -4.738834 | -1.105139 |
| H                      | 2.985473  | -4.672805 | 0.049873  | H                      | 3.004053  | -4.673170 | 0.080788  |
| H                      | 1.048295  | -3.352538 | 0.911104  | H                      | 1.065418  | -3.356711 | 0.939825  |
| H                      | -1.048284 | 3.352554  | 0.911035  | H                      | -1.065392 | 3.356734  | 0.939729  |
| H                      | -2.985464 | 4.672805  | 0.049784  | H                      | -3.004037 | 4.673171  | 0.080679  |
| H                      | -5.184234 | -0.216264 | -1.423830 | H                      | -5.178755 | -0.218710 | -1.438801 |
| O                      | -0.822267 | -0.818804 | -0.910481 | O                      | -0.824337 | -0.817541 | -0.912132 |
| O                      | -0.822078 | 0.819000  | 0.909697  | O                      | -0.824167 | 0.817715  | 0.911431  |
| O                      | 0.822276  | 0.818780  | -0.910498 | O                      | 0.824360  | 0.817509  | -0.912156 |
| O                      | 0.822087  | -0.818985 | 0.909714  | O                      | 0.824190  | -0.817694 | 0.911455  |

| $(R,S)_{ax-2}$         |           |           |           |                        |           |           |           |
|------------------------|-----------|-----------|-----------|------------------------|-----------|-----------|-----------|
| B3LYP/BS1              |           |           |           | B3LYP/BS2              |           |           |           |
| 69                     |           |           |           | 69                     |           |           |           |
| scf done: -1864.750803 |           |           |           | scf done: -1864.820920 |           |           |           |
| B                      | 0.000011  | 0.000699  | -0.001540 | B                      | -0.000104 | -0.000749 | -0.000363 |
| C                      | -6.183134 | -1.651136 | 3.121703  | C                      | -6.182527 | 3.123529  | 1.659484  |
| C                      | -6.190472 | -0.401350 | 2.459212  | C                      | -6.186761 | 2.468933  | 0.403638  |
| C                      | 1.905449  | 0.373556  | 1.456695  | C                      | 1.908760  | 1.461652  | -0.361787 |
| C                      | -5.135319 | -2.519354 | 2.912359  | C                      | -5.137609 | 2.903567  | 2.532374  |
| C                      | 3.020480  | 0.422019  | 0.613669  | C                      | 3.022535  | 0.617354  | -0.416644 |
| C                      | -5.177449 | -0.060196 | 1.589493  | C                      | -5.173809 | 1.596282  | 0.061416  |
| C                      | 4.091683  | 1.323489  | 0.942567  | C                      | 4.091828  | 0.948070  | -1.320912 |
| C                      | 1.898537  | 1.080488  | 2.690570  | C                      | 1.903250  | 2.703394  | -1.056080 |
| C                      | -1.906635 | 1.457796  | -0.374041 | C                      | -1.909549 | -0.362026 | -1.462188 |
| C                      | 4.069102  | 2.035996  | 2.190684  | C                      | 4.071408  | 2.201823  | -2.402450 |
| C                      | 3.020821  | -0.421142 | -0.614543 | C                      | 3.022692  | -0.617783 | 0.416205  |
| C                      | -3.021101 | 0.613963  | -0.421891 | C                      | -3.023027 | -0.416628 | -0.617470 |
| C                      | 5.178569  | 1.588704  | 0.059507  | C                      | 5.174537  | 0.061397  | -1.595269 |
| C                      | 4.092058  | -1.322845 | -0.942692 | C                      | 4.091982  | -0.948140 | -1.920608 |
| C                      | -1.901122 | 2.691750  | -1.080881 | C                      | -1.904689 | -1.056333 | -2.703933 |
| C                      | -4.093062 | 0.942127  | -1.322722 | C                      | -4.092536 | -1.320841 | -0.947673 |
| C                      | 6.192266  | 2.457652  | 0.400621  | C                      | 6.187988  | 0.403710  | -2.467306 |
| C                      | 5.137675  | 2.911404  | 2.518772  | C                      | 5.138958  | 2.532394  | -2.902503 |
| C                      | 1.906384  | -0.372464 | -1.458331 | C                      | 1.909206  | -1.462448 | 0.361217  |
| C                      | -4.071846 | 2.190288  | -2.035188 | C                      | -4.072754 | -2.024404 | -2.201423 |
| C                      | -3.020162 | -0.614255 | 0.421260  | C                      | -3.022558 | 0.416329  | 0.617603  |
| C                      | 6.185552  | 3.120054  | 1.650458  | C                      | 6.184051  | 1.659565  | -3.121888 |
| C                      | 2.957863  | 1.868213  | 3.059164  | C                      | 2.962981  | 3.074265  | -1.845546 |
| C                      | 4.070164  | -2.035398 | -2.190794 | C                      | 4.071882  | -2.201889 | 2.024162  |
| C                      | 1.900135  | -1.079455 | -2.692172 | C                      | 1.904005  | -2.704176 | 1.055534  |
| C                      | -2.961171 | 3.059601  | -1.867973 | C                      | -2.964699 | -1.845624 | -3.074362 |
| C                      | -5.179459 | 0.058275  | -1.587327 | C                      | -5.174807 | -1.595208 | -0.060458 |
| C                      | -1.905156 | -1.457231 | 0.371978  | C                      | -1.908809 | 0.361026  | 1.461886  |
| C                      | -2.956209 | -3.059602 | 1.867632  | C                      | -2.962228 | 1.845462  | 3.074358  |
| C                      | 5.178306  | -1.588243 | -0.058900 | C                      | 5.174374  | -0.061116 | 1.595079  |
| C                      | -6.193910 | 0.398664  | -2.455680 | C                      | -6.188468 | -2.467189 | -0.402292 |
| C                      | -5.141159 | 2.517610  | -2.909973 | C                      | -5.140512 | -2.902389 | -2.531497 |
| C                      | -1.897515 | -2.690997 | 1.079053  | C                      | -1.902892 | 1.055438  | 2.703545  |
| C                      | -4.090671 | -0.943165 | 1.323551  | C                      | -4.091345 | 1.321259  | 0.948186  |
| C                      | 2.959539  | -1.867424 | -3.060022 | C                      | 2.963757  | -3.074690 | 1.845140  |
| C                      | 6.186033  | -3.119867 | -1.649119 | C                      | 6.184221  | -1.658937 | 3.121842  |
| C                      | -4.067418 | -2.191226 | 2.036141  | C                      | -4.070550 | 2.024880  | 2.201891  |
| C                      | -6.188508 | 1.648522  | -3.118056 | C                      | -6.185196 | -3.121731 | -1.658168 |
| C                      | 5.138775  | -2.911040 | -2.518136 | C                      | 5.139434  | -2.532105 | 2.902347  |
| C                      | 6.192052  | -2.457413 | -0.399306 | C                      | 6.187832  | -0.403090 | 2.467242  |
| H                      | 2.946471  | 2.402973  | 4.007286  | H                      | 2.952152  | 4.027277  | -2.372184 |
| H                      | 1.018579  | 0.972245  | 3.317113  | H                      | 1.025930  | 3.333600  | -0.943133 |
| H                      | 5.102150  | 3.430433  | 3.475366  | H                      | 5.106322  | 3.492511  | -3.415782 |
| H                      | 7.001618  | 2.640734  | -0.302776 | H                      | 6.993934  | -0.302141 | -2.657339 |
| H                      | 6.993415  | 3.799083  | 1.913488  | H                      | 6.990357  | 1.924090  | -3.802605 |
| H                      | 5.194033  | 1.100892  | -0.908235 | H                      | 5.190562  | -0.909949 | -1.113294 |
| H                      | 5.193236  | -1.100390 | 0.908829  | H                      | 5.190148  | 0.910227  | 1.113090  |
| H                      | 7.000902  | -2.640626 | 0.304635  | H                      | 6.993530  | 0.303022  | 2.657358  |
| H                      | 6.993932  | -3.799071 | -1.911584 | H                      | 6.990533  | -1.923194 | 3.802656  |
| H                      | 5.103779  | -3.430101 | -3.474732 | H                      | 5.107047  | -3.492225 | 3.415634  |
| H                      | 2.948663  | -2.402228 | -4.008126 | H                      | 2.953169  | -4.027696 | 2.371794  |
| H                      | 1.020618  | -0.971055 | -3.319307 | H                      | 1.026901  | -3.334665 | 0.942492  |
| H                      | -2.944314 | -4.007651 | 2.402510  | H                      | -2.951113 | 2.372211  | 4.027305  |
| H                      | -5.099314 | -3.475903 | 3.431440  | H                      | -5.104713 | 3.416881  | 3.492463  |
| H                      | -1.017568 | -3.317451 | 0.970223  | H                      | -1.025601 | 0.942144  | 3.333727  |
| H                      | -6.990472 | -1.914203 | 3.801343  | H                      | -6.988444 | 3.804733  | 1.923939  |
| H                      | -6.996958 | 1.910969  | -3.796612 | H                      | -6.991663 | -3.802408 | -1.922307 |
| H                      | -5.106645 | 3.474252  | -3.428983 | H                      | -5.108357 | -3.415668 | -3.491629 |
| H                      | -2.950803 | 4.007782  | -2.402649 | H                      | -2.954342 | -2.372276 | -4.027372 |
| H                      | -1.021588 | 3.318968  | -0.973080 | H                      | -1.027606 | -0.943543 | -3.334499 |
| H                      | -7.002845 | -0.305329 | -2.638314 | H                      | -6.994065 | -2.657213 | 0.303961  |
| H                      | -5.193941 | -0.909492 | -1.099534 | H                      | -5.190332 | -1.113289 | 0.910920  |
| H                      | -5.193366 | 0.907500  | 1.101607  | H                      | -5.190044 | 1.114321  | -0.909929 |
| H                      | -6.999768 | 0.301972  | 2.642828  | H                      | -6.992540 | 2.659439  | -0.302276 |
| O                      | 0.827411  | -0.373789 | 1.159776  | O                      | 0.830511  | 1.156078  | 0.385749  |
| O                      | -0.827785 | -1.160148 | -0.376351 | O                      | -0.830914 | -0.387035 | 1.156225  |
| O                      | 0.828316  | 0.375154  | -1.162153 | O                      | 0.830958  | -1.157225 | -0.386477 |
| O                      | -0.827899 | 1.161782  | 0.372592  | O                      | -0.830976 | 0.385190  | -1.157076 |

| $(R,R)_{ax-5}$         |           |           |           |                        |           |           |           |
|------------------------|-----------|-----------|-----------|------------------------|-----------|-----------|-----------|
| B3LYP/BS1              |           |           |           | B3LYP/BS2              |           |           |           |
| 69                     |           |           |           | 69                     |           |           |           |
| scf done: -1907.945353 |           |           |           | scf done: -1908.014644 |           |           |           |
| C                      | -5.145837 | -0.927710 | 1.298153  | C                      | -5.144477 | -0.929287 | 1.306391  |
| C                      | -4.124052 | -1.502791 | 0.488226  | C                      | -4.123155 | -1.504995 | 0.495337  |
| C                      | -4.208737 | -2.909256 | 0.223349  | C                      | -4.202965 | -2.913191 | 0.234708  |
| C                      | -5.305942 | -3.659869 | 0.723548  | C                      | -5.297409 | -3.666349 | 0.741032  |
| C                      | -6.283197 | -3.064855 | 1.488700  | C                      | -6.275578 | -3.071404 | 1.509373  |
| C                      | -6.188677 | -1.684742 | 1.786429  | C                      | -6.185099 | -1.688300 | 1.801974  |
| C                      | -3.016964 | -0.745304 | -0.030771 | C                      | -3.019501 | -0.745386 | -0.030064 |
| C                      | -1.931511 | -1.423027 | -0.602735 | C                      | -1.935187 | -1.424314 | -0.600999 |
| C                      | -2.088862 | -2.806985 | -0.925006 | C                      | -2.083143 | -2.810191 | -0.922800 |
| C                      | -3.187134 | -3.528849 | -0.542518 | C                      | -3.180668 | -3.532517 | -0.533172 |
| C                      | -3.017021 | 0.744879  | 0.030655  | C                      | -3.019541 | 0.745034  | 0.029969  |
| C                      | -1.931798 | 1.422631  | 0.602996  | C                      | -1.935435 | 1.423970  | 0.601264  |
| C                      | -2.089237 | 2.806590  | 0.925167  | C                      | -2.083447 | 2.809854  | 0.922961  |
| C                      | -3.187405 | 3.528427  | 0.542320  | C                      | -3.180853 | 3.532174  | 0.532980  |
| C                      | -4.208760 | 2.908794  | -0.223847 | C                      | -4.202925 | 2.912826  | -0.235182 |
| C                      | -4.123962 | 1.502330  | -0.488702 | C                      | -4.123036 | 1.504628  | -0.495783 |
| C                      | -5.305837 | 3.659375  | -0.724380 | C                      | -5.297229 | 3.665973  | -0.741831 |
| C                      | -6.282840 | 3.064333  | -1.489830 | C                      | -6.275166 | 3.071016  | -1.510456 |
| C                      | -6.188189 | 1.684224  | -1.787539 | C                      | -6.184590 | 1.687913  | -1.803032 |
| C                      | -5.145477 | 0.927221  | -1.298947 | C                      | -5.144109 | 0.928910  | -1.307142 |
| O                      | -0.803017 | 0.806361  | 0.938688  | O                      | -0.805569 | 0.804560  | 0.939259  |
| B                      | 0.000000  | 0.000001  | 0.000344  | B                      | 0.000000  | 0.000002  | 0.000345  |
| O                      | -0.802585 | -0.806828 | -0.938008 | O                      | -0.805167 | -0.804995 | -0.938580 |
| I                      | -0.578809 | 3.768347  | 2.117098  | I                      | -0.583826 | 3.753867  | 2.127032  |
| I                      | -0.578097 | -3.768708 | -2.116544 | I                      | -0.583218 | -3.754188 | -2.126511 |
| O                      | 0.803025  | -0.806360 | 0.938681  | O                      | 0.805577  | -0.804557 | 0.939252  |
| C                      | 1.931802  | -1.422631 | 0.602978  | C                      | 1.935439  | -1.423970 | 0.601246  |
| C                      | 3.017020  | -0.744881 | 0.030627  | C                      | 3.019540  | -0.745035 | 0.029941  |
| C                      | 4.123955  | -1.502333 | -0.488741 | C                      | 4.123028  | -1.504632 | -0.495823 |
| C                      | 4.208754  | -2.908797 | -0.223886 | C                      | 4.202917  | -2.912830 | -0.235221 |
| C                      | 3.187406  | -3.528428 | 0.542291  | C                      | 3.180852  | -3.532176 | 0.532951  |
| C                      | 2.089242  | -2.806590 | 0.925149  | C                      | 2.083451  | -2.809853 | 0.922943  |
| C                      | 5.145463  | -0.927226 | -1.298997 | C                      | 5.144093  | -0.928916 | -1.307192 |
| C                      | 6.188169  | -1.684230 | -1.787599 | C                      | 6.184569  | -1.687922 | -1.803092 |
| C                      | 6.282822  | -3.064339 | -1.489890 | C                      | 6.275145  | -3.071025 | -1.510516 |
| C                      | 5.305825  | -3.659379 | -0.724430 | C                      | 5.297214  | -3.665979 | -0.741881 |
| C                      | 3.016965  | 0.745302  | -0.030799 | C                      | 3.019502  | 0.745384  | -0.030092 |
| C                      | 4.124059  | 1.502787  | 0.488188  | C                      | 4.123163  | 1.504991  | 0.495299  |
| C                      | 4.208743  | 2.909253  | 0.223311  | C                      | 4.202973  | 2.913187  | 0.234671  |
| C                      | 3.187133  | 3.528848  | -0.542544 | C                      | 3.180670  | 3.532516  | -0.533198 |
| C                      | 2.088856  | 2.806986  | -0.925023 | C                      | 2.083139  | 2.810193  | -0.922816 |
| C                      | 1.931507  | 1.423028  | -0.602752 | C                      | 1.935184  | 1.424315  | -0.601016 |
| C                      | 5.305953  | 3.659864  | 0.723500  | C                      | 5.297424  | 3.666342  | 0.740985  |
| C                      | 6.283216  | 3.064848  | 1.488642  | C                      | 6.275598  | 3.071395  | 1.509315  |
| C                      | 6.188697  | 1.684735  | 1.786370  | C                      | 6.185120  | 1.688291  | 1.801917  |
| C                      | 5.145852  | 0.927705  | 1.298104  | C                      | 5.144491  | 0.929280  | 1.306343  |
| I                      | 0.578080  | 3.768712  | -2.116543 | I                      | 0.583204  | 3.754193  | -2.126511 |
| O                      | 0.802577  | 0.806831  | -0.938014 | O                      | 0.805159  | 0.804998  | -0.938587 |
| I                      | 0.578826  | -3.768344 | 2.117096  | I                      | 0.583840  | -3.753863 | 2.127030  |
| H                      | -3.280058 | 4.579633  | 0.796454  | H                      | -3.271638 | 4.584556  | 0.785288  |
| H                      | 3.280061  | -4.579634 | 0.796426  | H                      | 3.271637  | -4.584557 | 0.785259  |
| H                      | 5.349289  | -4.723259 | -0.499551 | H                      | 5.339051  | -4.731189 | -0.521356 |
| H                      | -5.083485 | -0.124972 | -1.550452 | H                      | -5.087724 | -0.125539 | -1.553354 |
| H                      | 6.942351  | -1.215562 | -2.415335 | H                      | 6.938942  | -1.218605 | -2.430651 |
| H                      | 7.113495  | -3.650244 | -1.875651 | H                      | 7.102769  | -3.658874 | -1.900753 |
| H                      | 5.083469  | 0.124967  | -1.550502 | H                      | 5.087708  | 0.125533  | -1.553404 |
| H                      | -7.113974 | -3.650783 | 1.874203  | H                      | -7.103316 | -3.659259 | 1.899359  |
| H                      | 5.083972  | -0.124491 | 1.549627  | H                      | 5.088192  | -0.125168 | 1.552575  |
| H                      | -6.942377 | 1.215554  | -2.415267 | H                      | -6.938969 | 1.218595  | -2.430582 |
| H                      | -7.113518 | 3.650237  | -1.875583 | H                      | -7.102795 | 3.658864  | -1.900685 |
| H                      | -5.349300 | 4.723255  | -0.499502 | H                      | -5.339065 | 4.731183  | -0.521306 |
| H                      | -6.943070 | -1.216090 | 2.413923  | H                      | -6.939666 | -1.218987 | 2.429302  |
| H                      | -5.349303 | -4.723750 | 0.498657  | H                      | -5.339172 | -4.731559 | 0.520490  |
| H                      | 6.943096  | 1.216081  | 2.413856  | H                      | 6.939692  | 1.218976  | 2.429236  |
| H                      | 7.113998  | 3.650774  | 1.874137  | H                      | 7.103341  | 3.659248  | 1.899294  |
| H                      | 5.349314  | 4.723746  | 0.498611  | H                      | 5.339186  | 4.731552  | 0.520443  |
| H                      | 3.279690  | 4.580048  | -0.796743 | H                      | 3.271386  | 4.584886  | -0.785577 |
| H                      | -3.279693 | -4.580049 | -0.796718 | H                      | -3.271385 | -4.584887 | -0.785551 |
| H                      | -5.083957 | 0.124485  | 1.549677  | H                      | -5.088177 | 0.125162  | 1.552623  |

| <b>(R,S)<sub>ax</sub>-5</b> |           |           |           |                        |           |           |           |
|-----------------------------|-----------|-----------|-----------|------------------------|-----------|-----------|-----------|
| <b>B3LYP/BS1</b>            |           |           |           | <b>B3LYP/BS2</b>       |           |           |           |
| 69                          |           |           |           | 69                     |           |           |           |
| scf done: -1907.952500      |           |           |           | scf done: -1908.022744 |           |           |           |
| C                           | 5.133755  | -1.597200 | 0.046217  | C                      | 5.131641  | -0.081551 | 1.603716  |
| C                           | 4.079510  | -1.288685 | 0.954293  | C                      | 4.076271  | 0.847508  | 1.367943  |
| C                           | 4.102261  | -1.933271 | 2.234814  | C                      | 4.090293  | 2.070053  | 2.118311  |
| C                           | 5.178583  | -2.797086 | 2.572564  | C                      | 5.162271  | 2.336568  | 3.014359  |
| C                           | 6.191750  | -3.052535 | 1.676886  | C                      | 6.178273  | 1.423430  | 3.199792  |
| C                           | 6.155685  | -2.452955 | 0.395274  | C                      | 6.149846  | 0.195821  | 2.492692  |
| C                           | 2.998004  | -0.403111 | 0.626959  | C                      | 2.999908  | 0.593828  | 0.451174  |
| C                           | 1.896355  | -0.305939 | 1.487624  | C                      | 1.898500  | 1.458424  | 0.422713  |
| C                           | 1.968140  | -0.934096 | 2.766973  | C                      | 1.956188  | 2.682809  | 1.154693  |
| C                           | 3.035611  | -1.706143 | 3.142624  | C                      | 3.021087  | 2.992073  | 1.962222  |
| C                           | 2.997590  | 0.402727  | -0.628024 | C                      | 2.999903  | -0.593845 | -0.451171 |
| C                           | 1.895569  | 0.305186  | -1.488152 | C                      | 1.898490  | -1.458435 | -0.422706 |
| C                           | 1.966472  | 0.933375  | -2.767519 | C                      | 1.956170  | -2.682822 | -1.154683 |
| C                           | 3.033493  | 1.705802  | -3.143681 | C                      | 3.021066  | -2.992092 | -1.962215 |
| C                           | 4.100519  | 1.933278  | -2.236399 | C                      | 4.090276  | -2.070078 | -2.118310 |
| C                           | 4.078640  | 1.288667  | -0.955875 | C                      | 4.076262  | -0.847532 | -1.367944 |
| C                           | 5.176389  | 2.797453  | -2.574678 | C                      | 5.162249  | -2.336600 | -3.014362 |
| C                           | 6.189917  | 3.053228  | -1.679503 | C                      | 6.178253  | -1.423467 | -3.199800 |
| C                           | 6.154696  | 2.453628  | -0.397876 | C                      | 6.149835  | -0.195856 | -2.492703 |
| C                           | 5.133229  | 1.597527  | -0.048318 | C                      | 5.131635  | 0.081522  | -1.603723 |
| O                           | 0.819221  | -0.410548 | -1.154461 | O                      | 0.822937  | -1.179946 | 0.323892  |
| B                           | 0.000028  | -0.000359 | 0.000091  | B                      | 0.000000  | 0.000000  | 0.000001  |
| O                           | 0.819579  | 0.409387  | 1.154582  | O                      | 0.822943  | 1.179944  | -0.323884 |
| I                           | 0.353892  | 0.640920  | -4.160065 | I                      | 0.348525  | -4.084250 | -0.960696 |
| I                           | 0.356088  | -0.642273 | 4.160269  | I                      | 0.348548  | 4.084245  | 0.960713  |
| O                           | -0.819611 | -1.154650 | 0.410135  | O                      | -0.822944 | 0.323890  | 1.179942  |
| C                           | -1.896378 | -1.487709 | -0.305230 | C                      | -1.898500 | -0.422707 | 1.458425  |
| C                           | -2.998001 | -0.627019 | -0.402388 | C                      | -2.999908 | -0.451171 | 0.593827  |
| C                           | -4.079586 | -0.954382 | -1.287848 | C                      | -4.076269 | -1.367941 | 0.847508  |
| C                           | -4.102363 | -2.234903 | -1.932433 | C                      | -4.090292 | -2.118306 | 2.070056  |
| C                           | -3.033682 | -3.142698 | -1.705389 | C                      | -3.021089 | -1.962211 | 2.992077  |
| C                           | -1.968176 | -2.767052 | -0.933385 | C                      | -1.956189 | -1.154681 | 2.682812  |
| C                           | -5.133914 | -0.046351 | -1.596203 | C                      | -5.131636 | -1.603719 | -0.081553 |
| C                           | -6.155925 | -0.395434 | -2.451850 | C                      | -6.149840 | -2.492698 | 0.195819  |
| C                           | -6.191993 | -1.677032 | -3.051462 | C                      | -6.178268 | -3.199793 | 1.423431  |
| C                           | -5.178765 | -2.572677 | -2.796140 | C                      | -5.162269 | -3.014355 | 2.336571  |
| C                           | -2.997519 | 0.627998  | 0.403392  | C                      | -2.999904 | 0.451174  | -0.593845 |
| C                           | -4.078638 | 0.955968  | 1.289197  | C                      | -4.076264 | 1.367946  | -0.847531 |
| C                           | -4.100504 | 2.236510  | 1.933768  | C                      | -4.090276 | 2.118316  | -2.070075 |
| C                           | -3.033402 | 3.143718  | 1.706357  | C                      | -3.021064 | 1.962226  | -2.992088 |
| C                           | -1.966351 | 2.767474  | 0.934013  | C                      | -1.956168 | 1.154694  | -2.682818 |
| C                           | -1.895447 | 1.488075  | 0.305870  | C                      | -1.898490 | 0.422713  | -1.458434 |
| C                           | -5.176444 | 2.574882  | 2.797819  | C                      | -5.162250 | 3.014367  | -2.336596 |
| C                           | -6.190076 | 1.679792  | 3.053484  | C                      | -6.178257 | 3.199801  | -1.423464 |
| C                           | -6.154900 | 0.398164  | 2.453882  | C                      | -6.149840 | 2.492700  | -0.195856 |
| C                           | -5.133357 | 0.048513  | 1.597909  | C                      | -5.131639 | 1.603720  | 0.081521  |
| I                           | -0.353681 | 4.159934  | 0.641622  | I                      | -0.348518 | 0.960718  | -4.084243 |
| O                           | -0.819078 | 1.154388  | -0.409801 | O                      | -0.822936 | -0.323886 | -1.179948 |
| I                           | -0.356145 | -4.160372 | -0.641583 | I                      | -0.348554 | -0.960692 | 4.084252  |
| H                           | -3.067732 | -4.121844 | -2.172923 | H                      | -3.047997 | -2.510069 | 3.929430  |
| H                           | -5.176699 | -3.554955 | -3.264550 | H                      | -5.155797 | -3.565062 | 3.275574  |
| H                           | -6.939145 | 0.325444  | -2.674131 | H                      | -6.934558 | -2.656408 | -0.539410 |
| H                           | -7.006835 | -1.943587 | -3.720160 | H                      | -6.988587 | -3.893692 | 1.634963  |
| H                           | -5.115892 | 0.944514  | -1.157751 | H                      | -5.121557 | -1.081168 | -1.031569 |
| H                           | -5.116009 | -0.942368 | 1.159466  | H                      | -5.121569 | 1.081165  | 1.031535  |
| H                           | -6.938439 | -0.322284 | 2.676429  | H                      | -6.934564 | 2.656408  | 0.539367  |
| H                           | -7.004554 | 1.946801  | 3.722443  | H                      | -6.988574 | 3.893702  | -1.635001 |
| H                           | -5.173693 | 3.557166  | 3.266215  | H                      | -5.155769 | 3.565078  | -3.275597 |
| H                           | -3.064763 | 4.122892  | 2.173879  | H                      | -3.047964 | 2.510091  | -3.929437 |
| H                           | 3.067635  | -2.173680 | 4.121769  | H                      | 3.047994  | 3.929423  | 2.510084  |
| H                           | 5.176498  | -3.265486 | 3.554847  | H                      | 5.155798  | 3.275569  | 3.565069  |
| H                           | 7.006526  | -3.721321 | 1.943419  | H                      | 6.988593  | 1.634962  | 3.893690  |
| H                           | 7.004337  | 3.722287  | -1.946439 | H                      | 6.988570  | -1.635004 | -3.893702 |
| H                           | 5.173659  | 3.265865  | -3.556953 | H                      | 5.155769  | -3.275603 | -3.565069 |
| H                           | 3.064870  | 2.173368  | -4.122833 | H                      | 3.047967  | -3.929444 | -2.510074 |
| H                           | 6.938139  | 2.676279  | 0.322645  | H                      | 6.934557  | 0.539368  | -2.656415 |
| H                           | 5.115839  | 1.159102  | 0.942569  | H                      | 5.121563  | 1.031538  | -1.081170 |
| H                           | 5.115732  | -1.158794 | -0.944667 | H                      | 5.121563  | -1.031565 | 1.081161  |
| H                           | 6.938841  | -2.675349 | -0.325639 | H                      | 6.934566  | -0.539407 | 2.656399  |

| $(R,R)_{ax}-6$         |           |           |           |                        |           |           |           |
|------------------------|-----------|-----------|-----------|------------------------|-----------|-----------|-----------|
| B3LYP/BS1              |           |           |           | B3LYP/BS2              |           |           |           |
| 93                     |           |           |           | 93                     |           |           |           |
| scf done: -2479.335195 |           |           |           | scf done: -2479.418874 |           |           |           |
| B                      | 0.000057  | 0.000489  | -0.000357 | B                      | 0.000050  | 0.000338  | -0.000362 |
| C                      | -6.247813 | -2.979458 | 1.703174  | C                      | -6.246623 | -2.982266 | 1.709380  |
| C                      | -6.155440 | -1.591972 | 1.906386  | C                      | -6.151121 | -1.593886 | 1.917966  |
| C                      | 1.935481  | -1.430060 | 0.532832  | C                      | 1.937973  | -1.430234 | 0.538085  |
| C                      | -5.279635 | -3.622217 | 0.953993  | C                      | -5.282029 | -3.624212 | 0.950844  |
| C                      | 3.015343  | -0.744405 | 0.011085  | C                      | 3.016528  | -0.744445 | 0.012763  |
| C                      | -5.113936 | -0.878584 | 1.345173  | C                      | -5.110109 | -0.879722 | 1.352675  |
| C                      | 4.117670  | -1.505829 | -0.553230 | C                      | 4.117594  | -1.506706 | -0.553920 |
| C                      | 2.012981  | -2.855245 | 0.790747  | C                      | 2.018949  | -2.853896 | 0.806160  |
| C                      | -1.935933 | 1.430658  | 0.532600  | C                      | -1.938287 | 1.430664  | 0.537901  |
| C                      | 4.200281  | -2.921020 | -0.369185 | C                      | 4.202987  | -2.921420 | -0.364140 |
| C                      | 3.015556  | 0.744671  | -0.011034 | C                      | 3.016656  | 0.744684  | -0.012789 |
| C                      | -3.015556 | 0.744512  | 0.010969  | C                      | -3.016684 | 0.744514  | 0.012701  |
| C                      | 5.114427  | -0.878192 | -1.344693 | C                      | 5.110638  | -0.879300 | -1.352171 |
| C                      | 4.118029  | 1.505759  | 0.553453  | C                      | 4.117752  | 1.506736  | 0.405117  |
| C                      | -2.014114 | 2.855824  | 0.790508  | C                      | -2.019753 | 2.854344  | 0.805896  |
| C                      | -4.118297 | 1.505414  | -0.553248 | C                      | -4.118054 | 1.506383  | -0.553926 |
| C                      | 6.156141  | -1.591459 | -1.905656 | C                      | 6.151884  | -1.593335 | -1.917171 |
| C                      | 5.280335  | -3.621809 | -0.953495 | C                      | 5.282773  | -3.623773 | -0.950297 |
| C                      | 1.935984  | 1.430638  | -0.532984 | C                      | 1.938309  | 1.430660  | -0.538298 |
| C                      | -4.201577 | 2.920563  | -0.369190 | C                      | -4.203931 | 2.921076  | -0.364188 |
| C                      | -3.015174 | -0.744567 | -0.011117 | C                      | -3.016376 | -0.744617 | -0.012825 |
| C                      | 6.248620  | -2.978945 | -1.702437 | C                      | 6.247493  | -2.981715 | -1.708563 |
| C                      | 3.157359  | -3.597132 | 0.387898  | C                      | 3.163214  | -3.596021 | 0.400857  |
| C                      | 4.201101  | 2.920925  | 0.369412  | C                      | 4.203427  | 2.921440  | 0.364401  |
| C                      | 2.013939  | 2.855802  | -0.790844 | C                      | 2.019556  | 2.854341  | -0.806235 |
| C                      | -3.158902 | 3.597165  | 0.387783  | C                      | -3.164304 | 3.596054  | 0.400685  |
| C                      | -5.114852 | 0.877327  | -1.344599 | C                      | -5.110946 | 0.878622  | -1.352075 |
| C                      | -1.935383 | -1.430117 | -0.533124 | C                      | -1.937887 | -1.430287 | -0.538407 |
| C                      | -3.156995 | -3.597316 | -0.387906 | C                      | -3.162838 | -3.596216 | -0.400874 |
| C                      | 5.114481  | 0.877833  | 1.345075  | C                      | 5.110552  | 0.879134  | 1.352521  |
| C                      | -6.156981 | 1.590105  | -1.905429 | C                      | -6.152498 | 1.592282  | -1.917005 |
| C                      | -5.282028 | 3.620851  | -0.953335 | C                      | -5.284003 | 3.623037  | -0.950255 |
| C                      | -2.012793 | -2.855296 | -0.791028 | C                      | -2.018762 | -2.853961 | -0.806462 |
| C                      | -4.117294 | -1.506104 | 0.553473  | C                      | -4.117213 | -1.507005 | 0.554161  |
| C                      | 3.158485  | 3.597355  | -0.387807 | C                      | 3.163873  | 3.596254  | -0.400711 |
| C                      | 6.249292  | 2.978232  | 1.702913  | C                      | 6.247738  | 2.981332  | 1.709137  |
| C                      | -4.199801 | -2.921308 | 0.369445  | C                      | -4.202491 | -2.921733 | 0.364404  |
| C                      | -6.250103 | 2.977538  | -1.702171 | C                      | -6.248578 | 2.980623  | -1.708422 |
| C                      | 5.281307  | 3.621386  | 0.953831  | C                      | 5.283252  | 3.623584  | 0.950735  |
| C                      | 6.156344  | 1.590785  | 1.906167  | C                      | 6.151836  | 1.592968  | 1.917706  |
| C                      | 0.970626  | 3.500205  | -1.493697 | C                      | 0.981220  | 3.497042  | -1.520682 |
| C                      | -3.212180 | -4.968292 | -0.731651 | C                      | -3.223173 | -4.966534 | -0.752084 |
| C                      | -2.185066 | -5.580381 | -1.428377 | C                      | -2.201967 | -5.577260 | -1.462664 |
| C                      | 1.053002  | 4.842565  | -1.810341 | C                      | 1.069362  | 4.838041  | -1.848527 |
| C                      | -1.051178 | -4.841635 | -1.810692 | C                      | -1.068184 | -4.837311 | -1.849060 |
| C                      | -0.969284 | -3.499254 | -1.494011 | C                      | -0.980352 | -3.496315 | -1.521101 |
| C                      | 2.185348  | -5.580325 | 1.428076  | C                      | 2.202278  | -5.577189 | 1.462367  |
| C                      | 1.051291  | -4.841686 | 1.810128  | C                      | 1.068319  | -4.837363 | 1.848493  |
| C                      | 0.969352  | -3.499310 | 1.493446  | C                      | 0.980428  | -3.496375 | 1.520528  |
| C                      | 3.212573  | -4.968114 | 0.731628  | C                      | 3.223599  | -4.966341 | 0.752062  |
| C                      | -3.214767 | 4.968114  | 0.731530  | C                      | -3.225135 | 4.966372  | 0.751833  |
| C                      | -2.187782 | 5.580824  | 1.427874  | C                      | -2.203948 | 5.577608  | 1.461990  |
| C                      | -1.053308 | 4.842761  | 1.809810  | C                      | -1.069677 | 4.838198  | 1.848011  |
| C                      | -0.970757 | 3.500421  | 1.493110  | C                      | -0.981365 | 3.497223  | 1.520103  |
| C                      | 2.187229  | 5.580843  | -1.428100 | C                      | 2.203397  | 5.577652  | -1.462200 |
| C                      | 3.214166  | 4.968328  | -0.731509 | C                      | 3.224525  | 4.966595  | -0.751806 |
| H                      | -5.038527 | 0.187168  | 1.525834  | H                      | -5.035308 | 0.186407  | 1.535373  |
| H                      | 2.261417  | 6.636427  | -1.680105 | H                      | 2.281688  | 6.631814  | 1.720013  |
| H                      | 5.345047  | 4.698335  | 0.834381  | H                      | 5.352544  | 4.699627  | 0.825288  |
| H                      | 0.242701  | 5.325051  | -2.350836 | H                      | 0.263614  | 5.318290  | -2.398479 |
| H                      | 7.063859  | 3.546966  | 2.145152  | H                      | 7.061052  | 3.551055  | 2.153100  |
| H                      | -0.110687 | 2.907945  | 1.781168  | H                      | -0.119402 | 2.906748  | 1.808972  |
| H                      | 6.896101  | 1.075865  | 2.514811  | H                      | 6.888387  | 1.078727  | 2.531262  |
| H                      | -0.242972 | 5.325399  | 2.350117  | H                      | -0.263884 | 5.318581  | 2.397784  |
| H                      | -5.342930 | -4.699198 | 0.834582  | H                      | -5.351015 | -4.700274 | 0.825387  |
| H                      | -2.262140 | 6.636390  | 1.679906  | H                      | -2.282379 | 6.631747  | 1.719852  |
| H                      | -6.895348 | -1.077339 | 2.515093  | H                      | -6.887751 | -1.079866 | 2.531612  |
| H                      | -4.084375 | 5.557543  | 0.458890  | H                      | -4.091582 | 5.558230  | 0.473883  |
| H                      | -5.345901 | 4.697794  | -0.833876 | H                      | -5.353446 | 4.699070  | -0.824803 |
| H                      | 4.081838  | -5.558007 | 0.458901  | H                      | 4.089803  | -5.558528 | 0.474050  |

|   |           |           |           |   |           |           |           |
|---|-----------|-----------|-----------|---|-----------|-----------|-----------|
| H | -7.064878 | 3.546134  | -2.144204 | H | -7.062090 | 3.550225  | -2.152178 |
| H | 0.109597  | -2.906426 | 1.781588  | H | 0.118702  | -2.905597 | 1.809484  |
| H | -6.896806 | 1.075049  | -2.513874 | H | -6.889110 | 1.077901  | -2.530370 |
| H | 0.240758  | -5.323930 | 2.350500  | H | 0.262417  | -5.317430 | 2.398380  |
| H | 5.038663  | -0.187880 | 1.525788  | H | 5.035446  | -0.186974 | 1.535206  |
| H | 2.259205  | -6.635923 | 1.680094  | H | 2.280379  | -6.631344 | 1.720264  |
| H | -7.062086 | -3.548530 | 2.145519  | H | -7.059706 | -3.552257 | 2.153422  |
| H | -0.109658 | -2.906273 | -1.782350 | H | -0.118760 | -2.905438 | -1.810259 |
| H | 5.038968  | 0.187554  | -1.525371 | H | 5.035752  | 0.186820  | -1.534884 |
| H | -0.240742 | -5.323780 | -2.351298 | H | -0.262372 | -5.317284 | -2.399161 |
| H | 6.896143  | -1.076757 | -2.514190 | H | 6.888630  | -1.079241 | -2.530616 |
| H | -2.258892 | -6.635988 | -1.680383 | H | -2.280021 | -6.631419 | -1.720557 |
| H | -5.038925 | -0.188377 | -1.525330 | H | -5.035720 | -0.187475 | -1.534787 |
| H | -4.081333 | -5.558254 | -0.458726 | H | -4.089248 | -5.558813 | -0.473865 |
| H | 5.343694  | -4.698783 | -0.834060 | H | 5.351843  | -4.699826 | -0.824816 |
| H | 0.110746  | 2.907560  | -1.781977 | H | 0.119438  | 2.906409  | -1.809771 |
| H | 7.063064  | -3.547925 | -2.144584 | H | 7.060771  | -3.551598 | -2.152386 |
| H | 4.083574  | 5.557941  | -0.458647 | H | 4.090784  | 5.558621  | -0.473628 |
| O | 0.813242  | 0.811880  | -0.925256 | O | 0.814454  | 0.810398  | -0.926813 |
| O | -0.812957 | 0.812167  | 0.924527  | O | -0.814202 | 0.810674  | 0.926080  |
| O | 0.812809  | -0.810970 | 0.924815  | O | 0.814118  | -0.809754 | 0.926318  |
| O | -0.812889 | -0.810877 | -0.925399 | O | -0.814206 | -0.809664 | -0.926920 |



| $(R,S)_{ax-6}$         |           |           |           |                        |           |           |           |
|------------------------|-----------|-----------|-----------|------------------------|-----------|-----------|-----------|
| B3LYP/BS1              |           |           |           | B3LYP/BS2              |           |           |           |
| 93                     |           |           |           | 93                     |           |           |           |
| scf done: -2479.340093 |           |           |           | scf done: -2479.423979 |           |           |           |
| B                      | 0.000071  | 0.000039  | -0.000013 | B                      | 0.000054  | -0.000016 | 0.000069  |
| C                      | -6.195504 | -1.350463 | 3.206449  | C                      | 6.189202  | 3.238169  | -1.294195 |
| C                      | -6.150291 | -0.145218 | 2.484812  | C                      | 6.140044  | 2.501753  | -0.095910 |
| C                      | 1.909452  | 0.443484  | 1.436167  | C                      | -1.911933 | 1.435117  | 0.457866  |
| C                      | -5.189190 | -2.283137 | 3.036642  | C                      | 5.188749  | 3.072461  | -2.237162 |
| C                      | 3.004231  | 0.449415  | 0.594340  | C                      | -3.004407 | 0.589682  | 0.455539  |
| C                      | -5.118467 | 0.089960  | 1.597030  | C                      | 5.110135  | 1.604547  | 0.121560  |
| C                      | 4.086483  | 1.380394  | 0.859376  | C                      | -4.084418 | 0.837811  | 1.394148  |
| C                      | 1.905296  | 1.196881  | 2.671803  | C                      | -1.915537 | 2.668869  | 1.215829  |
| C                      | -1.909343 | 1.436200  | -0.443424 | C                      | 1.912059  | -0.457804 | 1.435153  |
| C                      | 4.114973  | 2.142196  | 2.069549  | C                      | -4.117078 | 2.040138  | 2.168816  |
| C                      | 3.004213  | -0.449368 | -0.594391 | C                      | -3.004369 | -0.589783 | -0.455473 |
| C                      | -3.004125 | 0.594376  | -0.449326 | C                      | 3.004507  | -0.455493 | 0.589686  |
| C                      | 5.118360  | 1.597411  | -0.090337 | C                      | -5.110330 | -0.121518 | 1.604089  |
| C                      | 4.086435  | -1.380380 | -0.859437 | C                      | -4.084324 | -0.837942 | -1.394139 |
| C                      | -1.905231 | 2.671864  | -1.196779 | C                      | 1.915667  | -1.215801 | 2.668882  |
| C                      | -4.086502 | 0.859522  | -1.380115 | C                      | 4.084436  | -1.394238 | 0.837700  |
| C                      | 6.150088  | 2.485338  | 0.144709  | C                      | -6.140398 | 0.095984  | 2.501106  |
| C                      | 5.189198  | 3.037013  | 2.282758  | C                      | -5.189133 | 2.237205  | 3.071994  |
| C                      | 1.909427  | -0.443405 | -1.436208 | C                      | -1.911872 | -1.435186 | -0.457744 |
| C                      | -4.115035 | 2.069718  | -2.141876 | C                      | 4.117099  | -2.168938 | 2.040009  |
| C                      | -3.004087 | -0.594415 | 0.449371  | C                      | 3.004446  | 0.455584  | -0.589733 |
| C                      | 6.195372  | 3.206959  | 1.349961  | C                      | -6.189642 | 1.294265  | 3.237525  |
| C                      | 3.022202  | 2.004570  | 3.021660  | C                      | -3.031141 | 3.002031  | 2.033945  |
| C                      | 4.114891  | -2.142181 | -2.069611 | C                      | -4.116906 | -2.040269 | -2.168812 |
| C                      | 1.905238  | -1.196797 | -2.671847 | C                      | -1.915397 | -2.668936 | -1.215707 |
| C                      | -3.022201 | 3.021773  | -2.004360 | C                      | 3.031234  | -2.033994 | 3.001972  |
| C                      | -5.118526 | -0.090077 | -1.596902 | C                      | 5.110215  | -1.604339 | -0.121739 |
| C                      | -1.909271 | -1.436197 | 0.443429  | C                      | 1.911945  | 0.457835  | -1.435131 |
| C                      | -3.022010 | -3.021813 | 2.004406  | C                      | 3.030930  | 2.034090  | -3.002018 |
| C                      | 5.118313  | -1.597428 | 0.090267  | C                      | -5.110254 | 0.121357  | -1.604131 |
| C                      | -6.150394 | 0.145063  | -2.484642 | C                      | 6.140189  | -2.501486 | 0.095666  |
| C                      | -5.189396 | 2.283018  | -3.036508 | C                      | 5.189063  | -3.072246 | 2.236979  |
| C                      | -1.905084 | -2.671862 | 1.196782  | C                      | 1.915430  | 1.215832  | -2.668859 |
| C                      | -4.086416 | -0.859601 | 1.380204  | C                      | 4.084306  | 1.394390  | -0.837815 |
| C                      | 3.022117  | -2.004520 | -3.021713 | C                      | -3.030946 | -3.002128 | -2.033886 |
| C                      | 6.195261  | -3.207011 | -1.350040 | C                      | -6.189436 | -1.294456 | -3.237627 |
| C                      | -4.114874 | -2.069798 | 2.141965  | C                      | 4.116849  | 2.169094  | -2.040124 |
| C                      | -6.195682 | 1.350308  | -3.206276 | C                      | 6.189464  | -3.237899 | 1.293949  |
| C                      | 5.189085  | -3.037034 | -2.282828 | C                      | -5.188907 | -2.237367 | -3.072046 |
| C                      | 6.150011  | -2.485388 | -0.144788 | C                      | -6.140268 | -0.096176 | -2.501203 |
| C                      | 2.993669  | -2.663044 | -4.273805 | C                      | -3.010603 | -4.249655 | -2.704083 |
| C                      | 2.993782  | 2.663099  | 4.273750  | C                      | -3.010872 | 4.249561  | 2.704138  |
| C                      | 1.910526  | 2.546246  | 5.126587  | C                      | -1.936578 | 5.116787  | 2.586205  |
| C                      | 1.910411  | -2.546153 | -5.126635 | C                      | -1.936291 | -5.116850 | -2.586093 |
| C                      | 0.799061  | 1.765954  | 4.758398  | C                      | -0.826811 | 4.766783  | 1.792348  |
| C                      | 0.799390  | 1.102007  | 3.547010  | C                      | -0.819299 | 3.558301  | 1.119388  |
| C                      | -0.799006 | 4.758461  | -1.765869 | C                      | 0.826993  | -1.792317 | 4.766824  |
| C                      | -1.910533 | 5.126702  | -2.546049 | C                      | 1.936727  | -2.586253 | 5.116757  |
| C                      | -2.993818 | 4.273893  | -2.662836 | C                      | 3.010975  | -2.704229 | 4.249480  |
| C                      | -0.799303 | 3.547049  | -1.101965 | C                      | 0.819470  | -1.119323 | 3.558362  |
| C                      | -0.798762 | -4.758419 | 1.765826  | C                      | 0.826591  | 1.792292  | -4.766731 |
| C                      | -0.799128 | -3.547006 | 1.101924  | C                      | 0.819183  | 1.119292  | -3.558270 |
| C                      | -1.910244 | -5.126701 | 2.546050  | C                      | 1.936256  | 2.586294  | -5.116730 |
| C                      | -2.993556 | -4.273931 | 2.662880  | C                      | 3.010552  | 2.704329  | -4.249521 |
| C                      | 0.799329  | -1.101886 | -3.547046 | C                      | -0.819139 | -3.558338 | -1.119206 |
| C                      | 0.798972  | -1.765828 | -4.758436 | C                      | -0.826579 | -4.766818 | -1.792171 |
| H                      | -6.920289 | 0.609046  | 2.629833  | H                      | 6.904907  | 2.641085  | 0.665016  |
| H                      | -0.041818 | -0.494645 | -3.234596 | H                      | 0.022660  | -3.262916 | -0.503621 |
| H                      | -5.080392 | 1.029611  | 1.058597  | H                      | 5.072156  | 1.053372  | 1.054569  |
| H                      | 1.919812  | -3.064366 | -6.083035 | H                      | -1.951929 | -6.068592 | -3.113194 |
| H                      | -5.080395 | -1.029728 | -1.058473 | H                      | 5.072146  | -1.053167 | -1.054746 |
| H                      | -3.836969 | -4.584330 | 3.271401  | H                      | 3.850773  | 3.324397  | -4.545756 |
| H                      | -6.920370 | -0.609230 | -2.629634 | H                      | 6.905011  | -2.640776 | -0.665309 |
| H                      | -1.919641 | -6.083122 | 3.064223  | H                      | 1.951866  | 3.113429  | -6.068454 |
| H                      | -5.219455 | 3.193490  | -3.626396 | H                      | 5.224898  | -3.671298 | 3.141383  |
| H                      | 0.042052  | -3.234494 | 0.494759  | H                      | -0.022579 | 0.503645  | -3.262873 |
| H                      | -7.004359 | 1.542685  | -3.907427 | H                      | 6.995688  | -3.945751 | 1.473304  |
| H                      | 0.056847  | -5.424345 | 1.684998  | H                      | -0.021396 | 1.708860  | -5.442488 |
| H                      | -7.004146 | -1.542870 | 3.907633  | H                      | 6.995375  | 3.946066  | -1.473601 |

|   |           |           |           |   |           |           |           |
|---|-----------|-----------|-----------|---|-----------|-----------|-----------|
| H | 0.041912  | 3.234568  | -0.494833 | H | -0.022346 | -0.503725 | 3.263015  |
| H | -5.219192 | -3.193609 | 3.626532  | H | 5.224495  | 3.671516  | -3.141567 |
| H | -3.837267 | 4.584261  | -3.271323 | H | 3.851251  | -3.324246 | 4.545664  |
| H | 5.219080  | -3.626945 | -3.193287 | H | -5.224686 | -3.141782 | -3.671084 |
| H | -1.919985 | 6.083122  | -3.064222 | H | 1.952429  | -3.113383 | 6.068482  |
| H | 7.003803  | -3.908338 | -1.542348 | H | -6.995692 | -1.473914 | -3.945416 |
| H | 0.056582  | 5.424417  | -1.685075 | H | -0.020955 | -1.708933 | 5.442635  |
| H | 6.919880  | -2.630561 | 0.609579  | H | -6.905204 | 0.664696  | -2.640423 |
| H | -0.041778 | 0.494791  | 3.234568  | H | 0.022542  | 3.262900  | 0.503850  |
| H | 5.080203  | -1.059031 | 1.029934  | H | -5.072270 | 1.054355  | -1.052934 |
| H | -0.056507 | 1.685112  | 5.424374  | H | 0.021171  | 5.442555  | 1.708994  |
| H | 7.003937  | 3.908260  | 1.542263  | H | -6.995940 | 1.473698  | 3.945272  |
| H | 1.919949  | 3.064462  | 6.082985  | H | -1.952274 | 6.068531  | 3.113301  |
| H | 6.919954  | 2.630488  | -0.609665 | H | -6.905318 | -0.664911 | 2.640287  |
| H | 3.837176  | 3.271688  | 4.584070  | H | -3.851179 | 4.545806  | 3.324083  |
| H | 5.219221  | 3.626923  | 3.193217  | H | -5.224970 | 3.141621  | 3.671029  |
| H | 3.837041  | -3.271658 | -4.584133 | H | -3.850867 | -4.545922 | -3.324077 |
| H | 5.080224  | 1.059015  | -1.030004 | H | -5.072288 | -1.054516 | 1.052896  |
| H | -0.056597 | -1.684956 | -5.424407 | H | 0.021418  | -5.442566 | -1.708772 |
| O | 0.827933  | 0.314513  | -1.177676 | O | -0.828412 | -1.182253 | 0.300712  |
| O | -0.827774 | -1.177640 | -0.314475 | O | 0.828499  | -0.300635 | -1.182191 |
| O | -0.827810 | 1.177692  | 0.314447  | O | 0.828555  | 0.300605  | 1.182288  |
| O | 0.827937  | -0.314409 | 1.177655  | O | -0.828425 | 1.182227  | -0.300528 |

| $(R,R)_{ax-7}$         |           |           |           |                        |           |           |           |
|------------------------|-----------|-----------|-----------|------------------------|-----------|-----------|-----------|
| B3LYP/BS1              |           |           |           | B3LYP/BS2              |           |           |           |
| 45                     |           |           |           | 45                     |           |           |           |
| scf done: -1293.401258 |           |           |           | scf done: -1293.451389 |           |           |           |
| C                      | -1.947254 | -1.417154 | -0.672145 | C                      | -1.951723 | -1.418048 | -0.670720 |
| C                      | -3.065047 | -0.734289 | -0.117543 | C                      | -3.069396 | -0.734547 | -0.117859 |
| C                      | -4.239318 | -1.458383 | 0.146656  | C                      | -4.241509 | -1.463346 | 0.151367  |
| C                      | -4.369642 | -2.803982 | -0.183742 | C                      | -4.365882 | -2.811634 | -0.177830 |
| C                      | -3.313095 | -3.457274 | -0.819457 | C                      | -3.306712 | -3.462474 | -0.816240 |
| C                      | -2.134028 | -2.760960 | -1.058590 | C                      | -2.127944 | -2.763917 | -1.058920 |
| C                      | -3.065083 | 0.734003  | 0.117318  | C                      | -3.069426 | 0.734211  | 0.117736  |
| C                      | -1.947519 | 1.416786  | 0.672448  | C                      | -1.951918 | 1.417656  | 0.670970  |
| C                      | -2.134316 | 2.760620  | 1.058738  | C                      | -2.128076 | 2.763613  | 1.058845  |
| C                      | -3.313220 | 3.457025  | 0.819046  | C                      | -3.306689 | 3.462262  | 0.815659  |
| C                      | -4.369533 | 2.803793  | 0.182879  | C                      | -4.365720 | 2.811428  | 0.177012  |
| C                      | -4.239176 | 1.458176  | -0.147444 | C                      | -4.241372 | 1.463088  | -0.151995 |
| O                      | -0.795862 | 0.810170  | 0.935517  | O                      | -0.799142 | 0.807583  | 0.936082  |
| B                      | 0.000002  | -0.000027 | 0.000439  | B                      | 0.000002  | -0.000071 | 0.000384  |
| O                      | -0.795385 | -0.810725 | -0.934654 | O                      | -0.798753 | -0.808144 | -0.935333 |
| H                      | -5.065317 | 0.943015  | -0.629055 | H                      | -5.070225 | 0.952758  | -0.635042 |
| H                      | -5.287253 | 3.340776  | -0.042146 | H                      | -5.280427 | 3.352709  | -0.052111 |
| I                      | -0.555410 | 3.764103  | 2.128221  | I                      | -0.555134 | 3.746092  | 2.138588  |
| H                      | -5.065639 | -0.943156 | 0.627886  | H                      | -5.070496 | -0.952973 | 0.634138  |
| H                      | -5.287509 | -3.340893 | 0.040854  | H                      | -5.280733 | -3.352843 | 0.050886  |
| I                      | -0.554797 | -3.764527 | -2.127524 | I                      | -0.554922 | -3.746309 | -2.138634 |
| O                      | 0.795873  | -0.810219 | 0.935519  | O                      | 0.799193  | -0.807689 | 0.936086  |
| C                      | 1.947534  | -1.416829 | 0.672452  | C                      | 1.951979  | -1.417747 | 0.670972  |
| C                      | 3.065091  | -0.734040 | 0.117314  | C                      | 3.069440  | -0.734304 | 0.117638  |
| C                      | 4.239192  | -1.458203 | -0.147438 | C                      | 4.241405  | -1.463156 | -0.152079 |
| C                      | 4.369567  | -2.803813 | 0.182911  | C                      | 4.365829  | -2.811454 | 0.177068  |
| C                      | 3.313268  | -3.457042 | 0.819104  | C                      | 3.306883  | -3.462249 | 0.815894  |
| C                      | 2.134355  | -2.760649 | 1.058784  | C                      | 2.128248  | -2.763630 | 1.059062  |
| C                      | 3.065047  | 0.734253  | -0.117540 | C                      | 3.069389  | 0.734455  | -0.117950 |
| C                      | 4.239308  | 1.458354  | 0.146676  | C                      | 4.241483  | 1.463277  | 0.151297  |
| C                      | 4.369614  | 2.803965  | -0.183684 | C                      | 4.365778  | 2.811610  | -0.177747 |
| C                      | 3.313053  | 3.457265  | -0.819366 | C                      | 3.306524  | 3.462495  | -0.815972 |
| C                      | 2.133996  | 2.760942  | -1.058518 | C                      | 2.127778  | 2.763910  | -1.058677 |
| C                      | 1.947246  | 1.417117  | -0.672127 | C                      | 1.951669  | 1.417963  | -0.670705 |
| H                      | 5.065635  | 0.943127  | 0.627896  | H                      | 5.070505  | 0.952894  | 0.633997  |
| H                      | 5.287473  | 3.340883  | 0.040931  | H                      | 5.280607  | 3.352840  | 0.051010  |
| I                      | 0.554718  | 3.764541  | -2.127354 | I                      | 0.554498  | 3.746472  | -2.137861 |
| O                      | 0.795382  | 0.810684  | -0.934645 | O                      | 0.798709  | 0.808047  | -0.935322 |
| I                      | 0.555495  | -3.764108 | 2.128355  | I                      | 0.555564  | -3.745949 | 2.139326  |
| H                      | 5.287296  | -3.340786 | -0.042101 | H                      | 5.280559  | -3.352712 | -0.052019 |
| H                      | 5.065328  | -0.943038 | -0.629054 | H                      | 5.070222  | -0.952832 | -0.635193 |
| H                      | -3.401954 | 4.496943  | 1.115582  | H                      | -3.394030 | 4.502792  | 1.112217  |
| H                      | 3.402023  | -4.496948 | 1.115676  | H                      | 3.394319  | -4.502717 | 1.112641  |
| H                      | 3.401718  | 4.497177  | -1.115947 | H                      | 3.393800  | 4.503017  | -1.112579 |
| H                      | -3.401781 | -4.497171 | -1.116084 | H                      | -3.394083 | -4.502931 | -1.113046 |

| $(R,S)_{ax-7}$         |           |           |           |                        |           |           |           |
|------------------------|-----------|-----------|-----------|------------------------|-----------|-----------|-----------|
| B3LYP/BS1              |           |           |           | B3LYP/BS2              |           |           |           |
| 45                     |           |           |           | 45                     |           |           |           |
| scf done: -1293.406828 |           |           |           | scf done: -1293.458131 |           |           |           |
| C                      | -2.378567 | 3.960895  | -3.265420 | C                      | -2.376462 | 3.964121  | -3.267808 |
| C                      | -1.215054 | 4.771876  | -3.370210 | C                      | -1.213767 | 4.774841  | -3.375916 |
| C                      | -1.345159 | 6.107023  | -3.779546 | C                      | -1.350043 | 6.110957  | -3.785736 |
| C                      | -2.579546 | 6.651998  | -4.122825 | C                      | -2.590433 | 6.650548  | -4.123360 |
| C                      | -3.722514 | 5.853475  | -4.066435 | C                      | -3.732789 | 5.847974  | -4.058696 |
| C                      | -3.608150 | 4.533117  | -3.643102 | C                      | -3.615028 | 4.526911  | -3.633423 |
| C                      | 0.135871  | 4.211459  | -3.113155 | C                      | 0.138073  | 4.217440  | -3.112208 |
| C                      | 0.374329  | 3.346533  | -2.009747 | C                      | 0.372862  | 3.349950  | -2.010782 |
| C                      | 1.704221  | 2.956042  | -1.763088 | C                      | 1.697142  | 2.942136  | -1.756979 |
| C                      | 2.764046  | 3.348518  | -2.574486 | C                      | 2.761518  | 3.332943  | -2.565866 |
| C                      | 2.510645  | 4.161638  | -3.679849 | C                      | 2.516329  | 4.152966  | -3.670728 |
| C                      | 1.209037  | 4.584812  | -3.935364 | C                      | 1.217137  | 4.586337  | -3.931517 |
| O                      | -0.606610 | 2.998178  | -1.177093 | O                      | -0.613484 | 3.006919  | -1.176562 |
| B                      | -1.785161 | 2.235920  | -1.614865 | B                      | -1.787056 | 2.236348  | -1.615738 |
| O                      | -2.299294 | 2.675819  | -2.920187 | O                      | -2.292660 | 2.674827  | -2.925622 |
| H                      | 1.007323  | 5.213039  | -4.798655 | H                      | 1.025053  | 5.216419  | -4.796174 |
| H                      | 3.325401  | 4.458192  | -4.335293 | H                      | 3.335732  | 4.445503  | -4.322916 |
| I                      | 2.133573  | 1.731636  | -0.042282 | I                      | 2.098835  | 1.713636  | -0.044893 |
| H                      | -0.454076 | 6.727687  | -3.816486 | H                      | -0.462991 | 6.737835  | -3.827085 |
| H                      | -2.656817 | 7.691597  | -4.430468 | H                      | -2.673272 | 7.690029  | -4.431527 |
| I                      | -5.385755 | 3.315245  | -3.603242 | I                      | -5.374101 | 3.300479  | -3.575952 |
| O                      | -2.848365 | 2.443230  | -0.620706 | O                      | -2.857148 | 2.437107  | -0.626653 |
| C                      | -2.869072 | 1.810277  | 0.552249  | C                      | -2.871856 | 1.806816  | 0.551944  |
| C                      | -2.976793 | 0.394201  | 0.626940  | C                      | -2.981616 | 0.391625  | 0.629140  |
| C                      | -3.039047 | -0.222722 | 1.884966  | C                      | -3.041294 | -0.219633 | 1.891884  |
| C                      | -3.035826 | 0.516002  | 3.065145  | C                      | -3.032112 | 0.528042  | 3.068582  |
| C                      | -2.975064 | 1.908737  | 3.003542  | C                      | -2.965556 | 1.922351  | 2.999742  |
| C                      | -2.893343 | 2.530535  | 1.761641  | C                      | -2.884537 | 2.540662  | 1.754316  |
| C                      | -3.085881 | -0.432365 | -0.601893 | C                      | -3.084303 | -0.438504 | -0.598888 |
| C                      | -3.967300 | -1.523025 | -0.627579 | C                      | -3.964086 | -1.532464 | -0.630216 |
| C                      | -4.037997 | -2.383385 | -1.719977 | C                      | -4.032000 | -2.386458 | -1.730121 |
| C                      | -3.208797 | -2.165243 | -2.820904 | C                      | -3.204741 | -2.158048 | -2.833193 |
| C                      | -2.344382 | -1.075110 | -2.814464 | C                      | -2.342540 | -1.064238 | -2.824202 |
| C                      | -2.267997 | -0.173320 | -1.736090 | C                      | -2.269570 | -0.175402 | -1.733713 |
| H                      | -4.615874 | -1.686424 | 0.228739  | H                      | -4.614181 | -1.704663 | 0.223752  |
| H                      | -4.734116 | -3.218130 | -1.720109 | H                      | -4.725938 | -3.223579 | -1.735286 |
| I                      | -1.049949 | -0.787371 | -4.513388 | I                      | -1.054696 | -0.751274 | -4.511022 |
| O                      | -1.386348 | 0.826454  | -1.741428 | O                      | -1.384839 | 0.826361  | -1.734325 |
| I                      | -2.839340 | 4.684089  | 1.698658  | I                      | -2.820576 | 4.683135  | 1.668009  |
| H                      | -3.077774 | 0.015365  | 4.028982  | H                      | -3.072134 | 0.032968  | 4.035873  |
| H                      | -3.080174 | -1.307593 | 1.929496  | H                      | -3.083647 | -1.304458 | 1.945755  |
| H                      | -2.981510 | 2.502974  | 3.911261  | H                      | -2.967128 | 2.520438  | 3.905539  |
| H                      | -3.241596 | -2.829814 | -3.677866 | H                      | -3.237647 | -2.818389 | -3.694036 |
| H                      | -4.692234 | 6.256340  | -4.339293 | H                      | -4.705056 | 6.248975  | -4.327163 |
| H                      | 3.772680  | 3.016177  | -2.352393 | H                      | 3.768229  | 2.994090  | -2.342495 |

| $(R,R)_{ax}$ -TS- $(R,S)_{ax}$ -7 |           |           |           |                        |           |           |           |
|-----------------------------------|-----------|-----------|-----------|------------------------|-----------|-----------|-----------|
| B3LYP/BS1                         |           |           |           | B3LYP/BS2              |           |           |           |
| 45                                |           |           |           | 45                     |           |           |           |
| scf done: -1293.394735            |           |           |           | scf done: -1293.445390 |           |           |           |
| C                                 | 4.048158  | -0.196912 | 1.595255  | C                      | 4.055678  | -0.202532 | 1.596998  |
| C                                 | 2.981802  | 0.244309  | 0.796713  | C                      | 2.990405  | 0.239508  | 0.794673  |
| C                                 | 2.144851  | 1.284074  | 1.278057  | C                      | 2.150769  | 1.274633  | 1.279901  |
| C                                 | 2.482456  | 1.889291  | 2.501739  | C                      | 2.477852  | 1.883076  | 2.506231  |
| C                                 | 3.557593  | 1.461057  | 3.273715  | C                      | 3.554432  | 1.454684  | 3.278850  |
| C                                 | 4.336531  | 0.394257  | 2.822444  | C                      | 4.338041  | 0.388790  | 2.827342  |
| C                                 | 2.797081  | -0.323565 | -0.564182 | C                      | 2.806140  | -0.325817 | -0.567997 |
| C                                 | 1.510281  | -0.627352 | -1.096282 | C                      | 1.520373  | -0.627974 | -1.101978 |
| C                                 | 1.468472  | -1.283734 | -2.344803 | C                      | 1.467840  | -1.273159 | -2.356943 |
| C                                 | 2.609633  | -1.584842 | -3.080157 | C                      | 2.609948  | -1.564767 | -3.097722 |
| C                                 | 3.859621  | -1.231198 | -2.572883 | C                      | 3.862952  | -1.211901 | -2.591403 |
| C                                 | 3.937965  | -0.613135 | -1.328868 | C                      | 3.946503  | -0.604210 | -1.340539 |
| C                                 | -1.962142 | 1.354876  | -1.238275 | C                      | -1.965258 | 1.347251  | -1.237556 |
| C                                 | -2.907357 | 0.388035  | -0.754352 | C                      | -2.907323 | 0.378911  | -0.754041 |
| C                                 | -4.018796 | 0.146615  | -1.594773 | C                      | -4.009094 | 0.122913  | -1.605537 |
| C                                 | -4.273327 | 0.825294  | -2.777392 | C                      | -4.259151 | 0.801361  | -2.791113 |
| C                                 | -3.393624 | 1.818615  | -3.202939 | C                      | -3.386186 | 1.807639  | -3.207202 |
| C                                 | -2.268697 | 2.052559  | -2.434935 | C                      | -2.265382 | 2.051518  | -2.433235 |
| C                                 | -2.830282 | -0.364122 | 0.556418  | C                      | -2.837665 | -0.362194 | 0.563059  |
| C                                 | -1.774799 | -0.268397 | 1.524617  | C                      | -1.780104 | -0.275282 | 1.528783  |
| C                                 | -1.872026 | -1.043629 | 2.706442  | C                      | -1.874505 | -1.045119 | 2.715738  |
| C                                 | -2.939674 | -1.871982 | 3.004333  | C                      | -2.953977 | -1.858805 | 3.019509  |
| C                                 | -3.976203 | -1.950633 | 2.078137  | C                      | -4.000096 | -1.924329 | 2.099875  |
| C                                 | -3.904853 | -1.214694 | 0.903941  | C                      | -3.925886 | -1.193366 | 0.920588  |
| H                                 | -3.572144 | 2.379213  | -4.113954 | H                      | -3.565050 | 2.368831  | -4.118371 |
| O                                 | 0.382999  | -0.406629 | -0.424166 | O                      | 0.392415  | -0.414880 | -0.421902 |
| B                                 | -0.005818 | 0.874274  | 0.219138  | B                      | -0.003205 | 0.865708  | 0.220063  |
| O                                 | 1.122391  | 1.737119  | 0.548788  | O                      | 1.125882  | 1.728497  | 0.548848  |
| O                                 | -0.817018 | 1.692945  | -0.668006 | O                      | -0.816385 | 1.683727  | -0.666561 |
| O                                 | -0.722122 | 0.535247  | 1.444372  | O                      | -0.719171 | 0.522109  | 1.444581  |
| I                                 | -0.884524 | 3.555549  | -3.132977 | I                      | -0.892811 | 3.565702  | -3.099392 |
| I                                 | -0.436517 | -1.889260 | -3.150256 | I                      | -0.433435 | -1.879019 | -3.145742 |
| H                                 | 4.908762  | -0.331496 | -0.931076 | H                      | 4.919703  | -0.323653 | -0.946736 |
| H                                 | 4.759951  | -1.435736 | -3.146168 | H                      | 4.761511  | -1.408101 | -3.171173 |
| H                                 | 4.654339  | -1.026563 | 1.242539  | H                      | 4.665749  | -1.031260 | 1.247493  |
| H                                 | 5.164017  | 0.031798  | 3.426850  | H                      | 5.163022  | 0.025426  | 3.435395  |
| H                                 | -4.753694 | -1.304383 | 0.242256  | H                      | -4.781219 | -1.269962 | 0.265228  |
| H                                 | -4.841269 | -2.579560 | 2.271465  | H                      | -4.874455 | -2.538041 | 2.302409  |
| H                                 | -5.157602 | 0.585068  | -3.361785 | H                      | -5.132839 | 0.548802  | -3.386884 |
| H                                 | -4.733979 | -0.618106 | -1.329640 | H                      | -4.716381 | -0.652248 | -1.348302 |
| H                                 | 2.521894  | -2.079000 | -4.042043 | H                      | 2.521116  | -2.052780 | -4.063165 |
| H                                 | 3.776744  | 1.944328  | 4.220198  | H                      | 3.771298  | 1.937028  | 4.226872  |
| I                                 | 1.308480  | 3.551999  | 3.200682  | I                      | 1.302262  | 3.540088  | 3.189794  |
| H                                 | -2.964207 | -2.437039 | 3.929911  | H                      | -2.981530 | -2.421458 | 3.946974  |
| I                                 | -0.269350 | -0.931559 | 4.146903  | I                      | -0.268789 | -0.942348 | 4.139292  |
